# Supplementary material for: Overexpression of the High-Affinity Nitrate Transporter OsNRT2.3b Driven by Different Promoters in Barley Improves Yield and Nutrient Uptake Balance
Source: PubMed Central journal article supplement (PMC7072886; doi:10.3390/ijms21041320), 2020-02-15
Supplement: ijms-21-01320-s001.pdf [file ijms-21-01320-s001.pdf]

**Table S1. Primers used to amplify the *OsNRT2.3b* open reading frame and identification primers of hygromycin.**

| Gene name  | Primer | Sequence                   |
|------------|--------|----------------------------|
| OsNRT2.3b  | 5' (F) | GAGATGGAGGCTAAGCCGGTGGCG   |
|            | 5' (R) | TTCTTCACAC CCCGGCCGGC GACG |
| Hygromycin | 5'(F)  | CTTCTGCGGGCGATTGT          |
|            | 5''(R) | CAGCGTCTCCGACCTGAT         |

**Table S2. Primers used for quantitative real-time polymerase chain reaction.**

| Gene name | Forward primer (5'to 3') | Reverse primer (5'to3') |
|-----------|--------------------------|-------------------------|
| HvActin   | AGCAACTGGGATGACATGGAG    | GGGTCATCTTCTCTCTGTTGGC  |
| OsNRT2.3b | GCCATCCACAAGATCGGTAG     | TGTGGAGCTTCCCGTAGTTG    |
| HvNRT2.1  | TTGTGCACTTCCCACAATGG     | GACCCTTGGCTTTCTCCTCT    |
| HvNRT2.2  | ACCCAGCTCATTATGCCACT     | CCATCACCACGTGCATCATT    |
| HvNRT2.3  | GTGCCCTTTGGAACATCTGG     | AGGGTGCGACACCAAAGATA    |
| HvNAR2.3  | AAGAAGGACAAGACCTGCCA     | GTGATGCTGACGACGTTGAA    |

**Table S3. The effect of 0.2 mM NH<sub>4</sub><sup>+</sup> treatment on the distribution of total N, P and Fe in shoots and roots.**

| 0.2mM NH <sub>4</sub> <sup>+</sup> |        |        |        |        |        |        |        |
|------------------------------------|--------|--------|--------|--------|--------|--------|--------|
| Distribution ration of shoot (%)   | WT     | Ubi-1  | Ubi-2  | Ubi-3  | RSs1-1 | RSs1-2 | RSs1-3 |
| Total N                            | 69.79a | 72.48a | 73.31a | 78.63a | 75.85a | 71.30a | 71.52a |
| Total P                            | 56.07a | 59.80a | 62.80a | 73.94a | 70.27a | 63.67a | 60.61a |
| Total Fe                           | 14.05b | 9.73b  | 11.84b | 26.25a | 16.98b | 17.11b | 15.29b |
| Distribution ration of root (%)    | WT     | Ubi-1  | Ubi-2  | Ubi-3  | RSs1-1 | RSs1-2 | RSs1-3 |
| Total N                            | 30.21a | 27.52a | 26.69a | 21.37a | 24.15a | 28.70a | 28.48a |
| Total P                            | 43.93a | 40.20a | 37.20a | 26.06a | 29.73a | 36.33a | 39.39a |
| Total Fe                           | 85.95a | 90.27a | 88.16a | 73.75b | 83.02a | 82.89a | 84.71a |

**Table S3. The effect of 0.2 mM NH<sub>4</sub><sup>+</sup> treatment on the distribution of total N, P and Fe in shoots and roots.** Significant differences between transgenic and WT lines are indicated by different letters (P < 0.05, one-way ANOVA).

**Table S4. Comparison of the expression of *OsNRT2.3b* in transgenic barley driven by different promoters under 0.2mM NH<sub>4</sub><sup>+</sup>/NO<sub>3</sub><sup>-</sup> treatment.**

| Leaves                             | Ubi-1      | Ubi-2     | Ubi-3      | RSs1-1     | RSs1-2     | RSs1-3     |
|------------------------------------|------------|-----------|------------|------------|------------|------------|
| 0.2mM NH <sub>4</sub> <sup>+</sup> | 0.000958e  | 0.001218e | 0.001239e  | 0.000788e  | 0.000822e  | 0.000499e  |
| 0.2mM NO <sub>3</sub> <sup>-</sup> | 0.018984c  | 0.035601b | 0.079687a  | 0.009516d  | 0.009085d  | 0.013484d  |
| Sheath                             | Ubi-1      | Ubi-2     | Ubi-3      | RSs1-1     | RSs1-2     | RSs1-3     |
| 0.2mM NH <sub>4</sub> <sup>+</sup> | 0.0000259d | 0.000203d | 0.000387d  | 0.000195d  | 0.000123d  | 0.000278d  |
| 0.2mM NO <sub>3</sub> <sup>-</sup> | 0.0217b    | 0.0439a   | 0.0123c    | 0.0149c    | 0.0149c    | 0.0148c    |
| Root                               | Ubi-1      | Ubi-2     | Ubi-3      | RSs1-1     | RSs1-2     | RSs1-3     |
| 0.2mM NH <sub>4</sub> <sup>+</sup> | 0.0000477c | 0.000253c | 0.000271c  | 0.000126c  | 0.000126c  | 0.0000588c |
| 0.2mM NO <sub>3</sub> <sup>-</sup> | 0.00404ab  | 0.004614a | 0.001561bc | 0.0000219c | 0.0000851c | 0.000447c  |

**Table S4. Comparison of the expression of *OsNRT2.3b* in transgenic barley driven by different promoters under 0.2mM NH<sub>4</sub><sup>+</sup>/NO<sub>3</sub><sup>-</sup> treatment.** Significant differences between NO<sub>3</sub><sup>-</sup> and NH<sub>4</sub><sup>+</sup> condition in transgenic lines are indicated by different letters (P < 0.05, two-way ANOVA).

**Figure S1. Identification of transgenic barley lines by southern blot.**

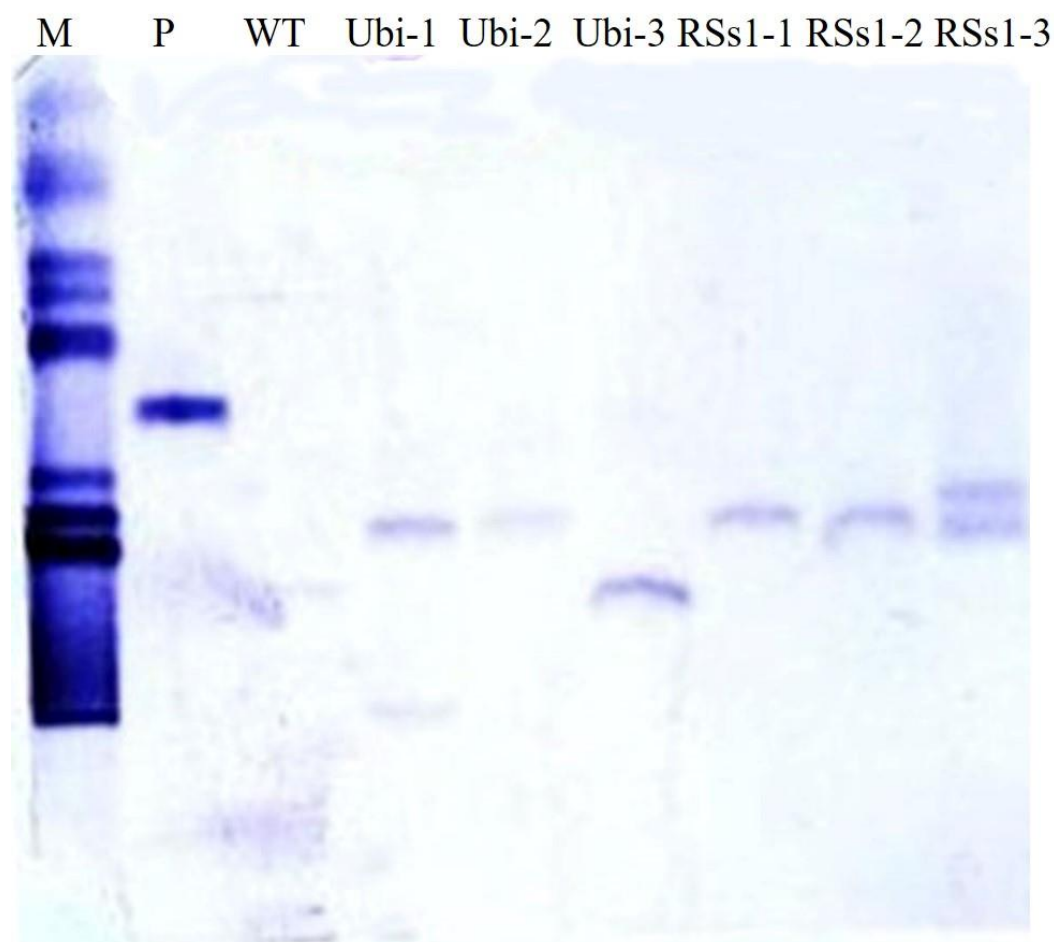

**Fig. S1. Identification of transgenic barley lines by southern blot.** Genomic DNA was isolated from WT and transgenic barley lines. Hybridization was performed using a hygromycin gene probe. M: maker, P: positive control.



**Figure S4. The relative expression of *HvNRT2s* in different plants parts under 0.2mM  $\text{NH}_4^+$  and 0.2mM  $\text{NO}_3^-$  treatments.**

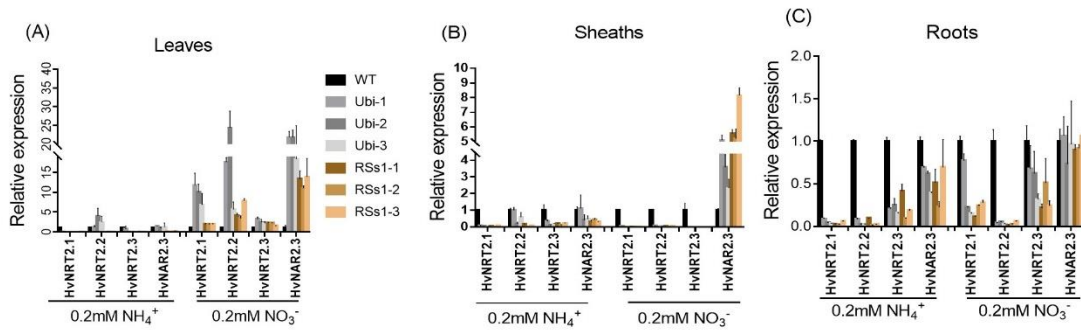

**Fig. S4. The relative expression of *HvNRT2s* in different plants parts under 0.2mM  $\text{NH}_4^+$  and 0.2mM  $\text{NO}_3^-$  treatments.** The relative expression of *HvNRT2.1/2.2/3* and *HvNAR2.3* in (A) leaves, (B) sheaths and (C) roots of all barley lines under 0.2mM  $\text{NH}_4^+$  and 0.2mM  $\text{NO}_3^-$  treatments. Significant differences between transgenic and WT lines are indicated by different letters ( $P < 0.05$ , one-way ANOVA). Error bars: standard error ( $n = 4$  plants).

**Figure S5. Phosphorus (P) and iron (Fe) concentrations in different plant parts under 0.2 mM  $\text{NH}_4^+$  and 0.2mM  $\text{NO}_3^-$  treatments.**

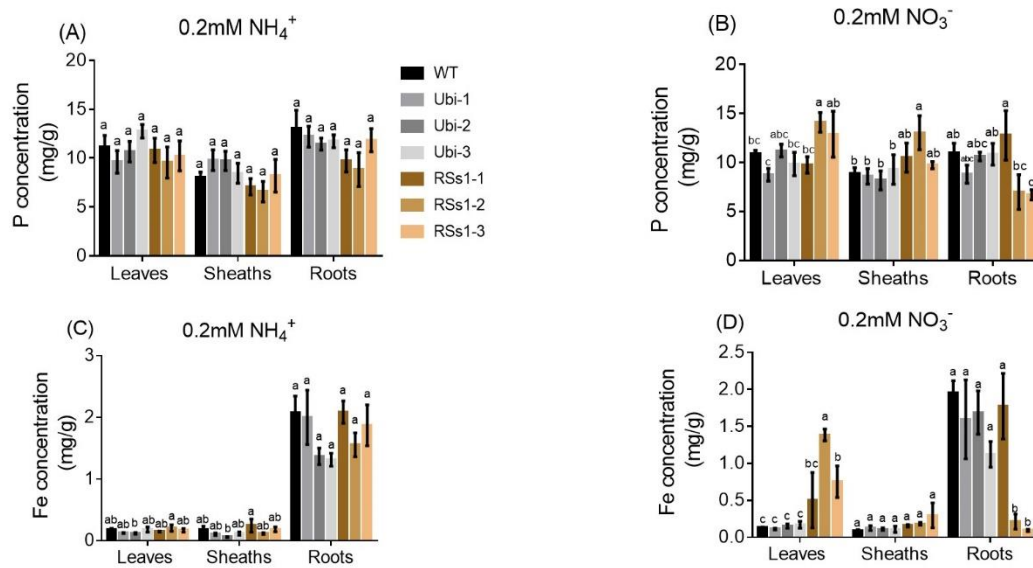

**Fig. S5. Phosphorus (P) and iron (Fe) concentrations in different plant parts under 0.2 mM  $\text{NH}_4^+$  and 0.2mM  $\text{NO}_3^-$  treatments.** (A) The concentration of P and (C) Fe in leaves, sheaths and roots of all barley lines under 0.2 mM  $\text{NH}_4^+$  condition. (B) The concentration of P and (D) Fe in leaves, sheaths and roots of all barley lines under 0.2mM  $\text{NO}_3^-$  condition. Significant differences between transgenic and WT lines are indicated by different letters ( $P < 0.05$ , one-way ANOVA). Error bars: standard error ( $n = 4$  plants).

**Figure S6. The characterization of all barley lines. Under 10 mM NH<sub>4</sub><sup>+</sup> condition after 10 mM NH<sub>4</sub><sup>+</sup>/NO<sub>3</sub><sup>-</sup> condition.**

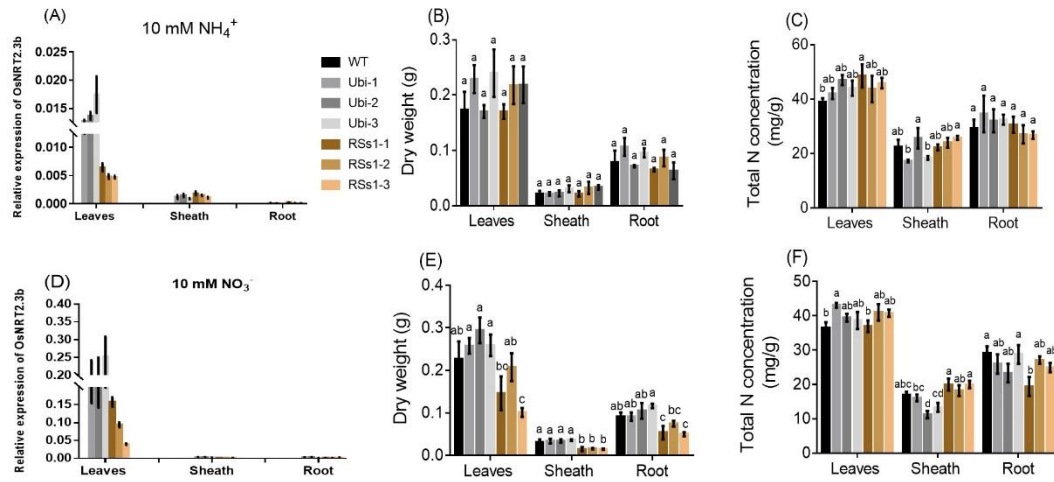

**Fig. S6. The characterization of all barley lines. Under 10 mM NH<sub>4</sub><sup>+</sup> condition after 10 mM NH<sub>4</sub><sup>+</sup>/NO<sub>3</sub><sup>-</sup> condition.** (A–C) 10 mM NH<sub>4</sub><sup>+</sup> (A) the relative expression of *OsNRT2.3b*, (B) the dry weights and (C) total N concentration of different plant parts. (D–F) 10 mM NO<sub>3</sub><sup>-</sup>, (D) the relative expression of *OsNRT2.3b*, (E) the dry weight and (F) total N concentration of different plant parts. Significant differences between transgenic and WT lines are indicated by different letters ( $P < 0.05$ , one-way ANOVA). Error bars: standard error ( $n = 4$  plants).
